# Supplementary material for: The Potential of Digested Sludge-Assimilating Microflora for Biogas Production from Food Processing Wastes
Source: MDPI journal article supplement (doi:10.3390/microorganisms11092321), 2023-09-15
Supplement: s1 [file s1]

Table S1. Biogas production from FPWs by the subcultured DABYS-A microflorae

| Substrate           | Gas            | Biogas yield in each subculture (mL/g-substrate) |                |                |                |                |                |                |                |                |                 | Average | Stdev | Biogas composition (%) |
|---------------------|----------------|--------------------------------------------------|----------------|----------------|----------------|----------------|----------------|----------------|----------------|----------------|-----------------|---------|-------|------------------------|
|                     |                | 1st subculture                                   | 2nd subculture | 3rd subculture | 4th subculture | 5th subculture | 6th subculture | 7th subculture | 8th subculture | 9th subculture | 10th subculture |         |       |                        |
| Cattle bone         | Methane        | 12.3                                             | 10.4           | 9.1            | 9.0            | 9.3            | 6.3            | 6.7            | 7.4            | 6.8            | 7.3             | 8.4     | 1.9   | 46.3% CH <sub>4</sub>  |
|                     | Hydrogen       | 0.0                                              | 0.0            | 0.0            | 0.0            | 0.0            | 0.2            | 0.0            | 0.0            | 0.2            | 0.2             | 0.1     | 0.1   | 0.4% H <sub>2</sub>    |
|                     | Carbon dioxide | 11.5                                             | 10.3           | 10.2           | 10.3           | 10.3           | 9.0            | 7.1            | 9.9            | 9.2            | 9.5             | 9.7     | 1.2   | 53.3% CO <sub>2</sub>  |
| Fish bone           | Methane        | 12.5                                             | 9.4            | 9.8            | 6.9            | 8.0            | 8.0            | 9.6            | 10.3           | 10.1           | 9.7             | 9.4     | 1.5   | 51.8% CH <sub>4</sub>  |
|                     | Hydrogen       | 0.0                                              | 0.0            | 0.0            | 0.1            | 0.1            | 0.0            | 0.0            | 0.2            | 1.4            | 0.0             | 0.2     | 0.4   | 1.0% H <sub>2</sub>    |
|                     | Carbon dioxide | 8.4                                              | 8.7            | 8.6            | 9.0            | 8.8            | 9.0            | 6.6            | 9.1            | 8.9            | 8.8             | 8.6     | 0.7   | 47.2% CO <sub>2</sub>  |
| Carrot peel         | Methane        | 0.0                                              | 0.0            | 0.0            | 0.0            | 0.0            | 0.0            | 0.0            | 0.0            | 0.0            | 0.0             | 0.0     | 0.0   | 0.0% CH <sub>4</sub>   |
|                     | Hydrogen       | 12.6                                             | 11.6           | 9.8            | 10.2           | 3.0            | 5.6            | 3.7            | 8.5            | 8.0            | 10.0            | 8.3     | 3.2   | 66.8% H <sub>2</sub>   |
|                     | Carbon dioxide | 8.3                                              | 5.4            | 4.2            | 4.4            | 2.2            | 2.7            | 1.6            | 3.7            | 3.9            | 4.8             | 4.1     | 1.9   | 33.2% CO <sub>2</sub>  |
| White radish peel   | Methane        | 0.0                                              | 0.0            | 0.0            | 0.0            | 0.0            | 0.0            | 0.0            | 0.0            | 0.0            | 0.0             | 0.0     | 0.0   | 0.0% CH <sub>4</sub>   |
|                     | Hydrogen       | 7.8                                              | 11.6           | 8.6            | 6.5            | 7.8            | 5.2            | 8.3            | 5.6            | 7.2            | 6.6             | 7.5     | 1.8   | 52.2% H <sub>2</sub>   |
|                     | Carbon dioxide | 6.1                                              | 5.1            | 8.1            | 7.6            | 6.8            | 6.7            | 7.8            | 7.0            | 6.2            | 7.6             | 6.9     | 0.9   | 47.8% CO <sub>2</sub>  |
| Cabbage stem        | Methane        | 0.0                                              | 0.0            | 0.0            | 0.0            | 0.0            | 0.0            | 0.0            | 0.0            | 0.0            | 0.0             | 0.0     | 0.0   | 0.0% CH <sub>4</sub>   |
|                     | Hydrogen       | 12.9                                             | 10.2           | 11.8           | 10.8           | 10.5           | 10.0           | 12.0           | 10.8           | 11.0           | 11.0            | 11.1    | 0.9   | 56.2% H <sub>2</sub>   |
|                     | Carbon dioxide | 7.0                                              | 8.0            | 9.0            | 10.1           | 8.9            | 9.5            | 10.0           | 8.9            | 7.0            | 7.9             | 8.6     | 1.1   | 43.8% CO <sub>2</sub>  |
| Lotus root peel     | Methane        | 0.0                                              | 0.0            | 0.0            | 0.0            | 0.0            | 0.0            | 0.0            | 0.0            | 0.0            | 0.0             | 0.0     | 0.0   | 0.0% CH <sub>4</sub>   |
|                     | Hydrogen       | 4.2                                              | 1.2            | 2.4            | 2.4            | 2.7            | 0.2            | 4.3            | 4.0            | 3.7            | 4.0             | 2.9     | 1.4   | 37.6% H <sub>2</sub>   |
|                     | Carbon dioxide | 5.8                                              | 6.4            | 3.9            | 4.0            | 4.1            | 4.7            | 3.6            | 5.5            | 5.1            | 5.3             | 4.8     | 0.9   | 62.4% CO <sub>2</sub>  |
| Apple core and peel | Methane        | 0.0                                              | 0.0            | 0.0            | 0.0            | 0.0            | 0.0            | 0.0            | 0.0            | 0.0            | 0.0             | 0.0     | 0.0   | 0.0% CH <sub>4</sub>   |
|                     | Hydrogen       | 13.9                                             | 7.7            | 9.9            | 8.5            | 9.5            | 9.1            | 7.1            | 9.1            | 9.0            | 9.0             | 9.3     | 1.8   | 73.9% H <sub>2</sub>   |
|                     | Carbon dioxide | 4.8                                              | 2.8            | 3.8            | 3.8            | 3.4            | 3.0            | 0.5            | 3.5            | 3.7            | 3.4             | 3.3     | 1.1   | 26.1% CO <sub>2</sub>  |
| Orange peel         | Methane        | 0.0                                              | 0.0            | 0.0            |                |                |                |                |                |                |                 |         |       |                        |
|                     | Hydrogen       | 0.0                                              | 0.0            | 0.0            |                |                |                |                |                |                |                 |         |       |                        |
|                     | Carbon dioxide | 0.0                                              | 0.0            | 0.0            |                |                |                |                |                |                |                 |         |       |                        |
| Grape peel          | Methane        | 0.0                                              | 0.0            | 0.0            | 0.0            | 0.0            | 0.0            | 0.0            | 0.0            | 0.0            | 0.0             | 0.0     | 0.0   | 0.0% CH <sub>4</sub>   |
|                     | Hydrogen       | 10.3                                             | 9.1            | 9.1            | 10.6           | 11.4           | 9.1            | 9.0            | 10.2           | 8.2            | 9.2             | 9.6     | 1.0   | 73.3% H <sub>2</sub>   |
|                     | Carbon dioxide | 5.2                                              | 3.1            | 4.1            | 3.0            | 2.9            | 3.3            | 3.8            | 2.8            | 3.7            | 3.0             | 3.5     | 0.7   | 26.7% CO <sub>2</sub>  |
| Rice bran           | Methane        | 0.0                                              | 0.0            | 0.0            | 0.0            | 0.0            | 0.0            | 0.0            | 0.0            | 0.0            | 0.0             | 0.0     | 0.0   | 0.0% CH <sub>4</sub>   |
|                     | Hydrogen       | 10.0                                             | 11.8           | 6.9            | 5.8            | 5.4            | 14.6           | 8.2            | 13.6           | 14.3           | 12.2            | 10.3    | 3.5   | 55.9% H <sub>2</sub>   |
|                     | Carbon dioxide | 10.7                                             | 9.4            | 1.6            | 7.2            | 8.4            | 9.9            | 6.0            | 8.4            | 9.8            | 9.6             | 8.1     | 2.7   | 44.1% CO <sub>2</sub>  |
| Wheat bran          | Methane        | 0.0                                              | 0.0            | 0.0            | 0.0            | 0.0            | 0.0            | 0.0            | 0.0            | 0.0            | 0.0             | 0.0     | 0.0   | 0.0% CH <sub>4</sub>   |
|                     | Hydrogen       | 7.9                                              | 10.8           | 12.6           | 13.5           | 17.1           | 15.2           | 15.3           | 14.7           | 16.3           | 14.2            | 13.8    | 2.7   | 60.9% H <sub>2</sub>   |
|                     | Carbon dioxide | 8.8                                              | 9.9            | 7.9            | 8.9            | 9.6            | 9.8            | 8.8            | 8.5            | 8.4            | 7.9             | 8.9     | 0.7   | 39.1% CO <sub>2</sub>  |
| Rice hull           | Methane        | 0.0                                              | 0.0            | 0.0            | 0.0            | 0.0            | 0.0            | 0.0            | 0.0            | 0.0            | 0.0             | 0.0     | 0.0   | 0.0% CH <sub>4</sub>   |
|                     | Hydrogen       | 1.3                                              | 1.3            | 1.0            | 1.3            | 0.7            | 0.6            | 0.9            | 0.6            | 0.7            | 1.0             | 0.9     | 0.3   | 64.3% H <sub>2</sub>   |
|                     | Carbon dioxide | 0.6                                              | 0.5            | 0.6            | 0.3            | 0.7            | 0.3            | 0.6            | 0.6            | 0.4            | 0.6             | 0.5     | 0.1   | 35.7% CO <sub>2</sub>  |
| Soy sauce lees      | Methane        | 0.0                                              | 0.0            | 0.0            | 0.0            | 0.0            | 0.0            | 0.0            | 0.0            | 0.0            | 0.0             | 0.0     | 0.0   | 0.0% CH <sub>4</sub>   |
|                     | Hydrogen       | 1.1                                              | 1.9            | 1.6            | 1.8            | 2.0            | 2.1            | 2.0            | 1.8            | 2.1            | 2.2             | 1.8     | 0.3   | 44.8% H <sub>2</sub>   |
|                     | Carbon dioxide | 2.7                                              | 3.0            | 2.7            | 2.4            | 2.7            | 2.0            | 2.2            | 2.0            | 1.3            | 1.8             | 2.3     | 0.5   | 55.2% CO <sub>2</sub>  |
| Spent bonito flakes | Methane        | 12.4                                             | 12.0           | 12.0           | 12.4           | 11.9           | 10.3           | 11.0           | 11.1           | 12.0           | 11.8            | 11.7    | 0.7   | 58.8% CH <sub>4</sub>  |
|                     | Hydrogen       | 0.1                                              | 0.1            | 0.2            | 0.3            | 0.1            | 0.3            | 0.2            | 0.9            | 0.2            | 0.3             | 0.3     | 0.2   | 1.3% H <sub>2</sub>    |
|                     | Carbon dioxide | 7.1                                              | 6.6            | 7.0            | 7.5            | 7.1            | 8.0            | 7.8            | 8.7            | 9.1            | 10.3            | 7.9     | 1.1   | 39.9% CO <sub>2</sub>  |
| Spent dried kelp    | Methane        | 0.0                                              | 0.0            | 0.0            | 0.0            | 0.0            | 0.0            | 0.0            | 0.0            | 0.0            | 0.0             | 0.0     | 0.0   | 0.0% CH <sub>4</sub>   |
|                     | Hydrogen       | 6.7                                              | 10.7           | 10.0           | 10.5           | 9.0            | 8.5            | 6.5            | 10.5           | 9.8            | 9.1             | 9.1     | 1.5   | 90.7% H <sub>2</sub>   |
|                     | Carbon dioxide | 0.7                                              | 0.9            | 0.8            | 1.0            | 1.1            | 0.7            | 0.3            | 1.2            | 1.1            | 1.5             | 0.9     | 0.3   | 9.3% CO <sub>2</sub>   |
| Spent tea leaf      | Methane        | 0.0                                              | 0.0            | 0.0            | 0.0            | 0.0            | 0.0            | 0.0            | 0.0            | 0.0            | 0.0             | 0.0     | 0.0   | 0.0% CH <sub>4</sub>   |
|                     | Hydrogen       | 2.9                                              | 3.0            | 2.5            | 3.1            | 3.1            | 3.0            | 2.7            | 3.1            | 2.8            | 3.0             | 2.9     | 0.2   | 48.9% H <sub>2</sub>   |
|                     | Carbon dioxide | 2.8                                              | 2.9            | 3.1            | 3.1            | 3.0            | 2.7            | 2.6            | 3.5            | 3.1            | 3.7             | 3.0     | 0.3   | 51.1% CO <sub>2</sub>  |
| Spent coffee ground | Methane        | 0.0                                              | 0.0            | 0.0            | 0.0            | 0.0            | 0.0            | 0.0            | 0.0            | 0.0            | 0.0             | 0.0     | 0.0   | 0.0% CH <sub>4</sub>   |
|                     | Hydrogen       | 2.1                                              | 2.4            | 3.1            | 3.3            | 3.9            | 2.9            | 3.2            | 3.0            | 2.8            | 2.2             | 2.9     | 0.5   | 49.7% H <sub>2</sub>   |
|                     | Carbon dioxide | 3.0                                              | 2.7            | 3.1            | 2.6            | 2.2            | 4.0            | 3.1            | 3.0            | 2.6            | 3.0             | 2.9     | 0.5   | 50.3% CO <sub>2</sub>  |
| Rapeseed oil cake   | Methane        | 0.0                                              | 0.0            | 0.0            | 0.0            | 0.0            | 0.0            | 0.0            | 0.0            | 0.0            | 0.0             | 0.0     | 0.0   | 0.0% CH <sub>4</sub>   |
|                     | Hydrogen       | 14.1                                             | 7.4            | 7.4            | 8.0            | 7.7            | 12.8           | 6.8            | 15.8           | 17.7           | 16.1            | 11.4    | 4.3   | 54.1% H <sub>2</sub>   |
|                     | Carbon dioxide | 12.1                                             | 9.8            | 10.2           | 9.3            | 3.4            | 7.5            | 5.4            | 11.0           | 13.7           | 14.1            | 9.7     | 3.4   | 45.9% CO <sub>2</sub>  |

| Substrate           | Gas            | Biogas yield in each subculture (mL/g-substrate) |                |                |                |                |                |                |                |                |                 | Average | Stdev | Biogas composition (%) |
|---------------------|----------------|--------------------------------------------------|----------------|----------------|----------------|----------------|----------------|----------------|----------------|----------------|-----------------|---------|-------|------------------------|
|                     |                | 1st subculture                                   | 2nd subculture | 3rd subculture | 4th subculture | 5th subculture | 6th subculture | 7th subculture | 8th subculture | 9th subculture | 10th subculture |         |       |                        |
| Cattle bone         | Methane        | 12.1                                             | 11.5           | 13.0           | 10.0           | 12.6           | 10.7           | 13.5           | 14.2           | 8.8            | 8.7             | 11.5    | 1.9   | 63.7% CH <sub>4</sub>  |
|                     | Hydrogen       | 0.0                                              | 0.1            | 0.0            | 0.0            | 0.0            | 0.2            | 0.0            | 0.3            | 0.1            | 0.1             | 0.1     | 0.1   | 0.4% H <sub>2</sub>    |
|                     | Carbon dioxide | 5.7                                              | 6.6            | 6.1            | 7.0            | 6.8            | 7.5            | 7.1            | 6.5            | 5.6            | 5.9             | 6.5     | 0.6   | 35.9% CO <sub>2</sub>  |
| Fish bone           | Methane        | 11.1                                             | 9.5            | 8.8            | 10.5           | 8.4            | 8.8            | 8.5            | 6.8            | 8.3            | 8.6             | 9.0     | 1.2   | 57.3% CH <sub>4</sub>  |
|                     | Hydrogen       | 0.0                                              | 0.0            | 0.0            | 0.1            | 0.0            | 0.0            | 0.1            | 0.2            | 0.3            | 0.0             | 0.1     | 0.1   | 0.5% H <sub>2</sub>    |
|                     | Carbon dioxide | 6.5                                              | 7.0            | 5.9            | 6.7            | 6.5            | 7.3            | 6.5            | 6.8            | 6.8            | 6.0             | 6.6     | 0.4   | 42.2% CO <sub>2</sub>  |
| Carrot peel         | Methane        | 0.0                                              | 0.0            | 0.0            | 0.0            | 0.0            | 0.0            | 0.0            | 0.0            | 0.0            | 0.0             | 0.0     | 0.0   | 0.0% CH <sub>4</sub>   |
|                     | Hydrogen       | 7.5                                              | 8.4            | 9.0            | 9.5            | 8.7            | 10.0           | 7.7            | 10.3           | 9.5            | 9.2             | 9.0     | 0.9   | 74.0% H <sub>2</sub>   |
|                     | Carbon dioxide | 4.3                                              | 3.0            | 3.0            | 3.5            | 3.0            | 2.8            | 3.2            | 2.1            | 3.7            | 3.0             | 3.2     | 0.6   | 26.0% CO <sub>2</sub>  |
| White radish peel   | Methane        | 0.0                                              | 0.0            | 0.0            | 0.0            | 0.0            | 0.0            | 0.0            | 0.0            | 0.0            | 0.0             | 0.0     | 0.0   | 0.0% CH <sub>4</sub>   |
|                     | Hydrogen       | 6.5                                              | 8.1            | 7.7            | 6.9            | 7.3            | 7.4            | 6.1            | 6.3            | 6.8            | 6.3             | 6.9     | 0.7   | 50.0% H <sub>2</sub>   |
|                     | Carbon dioxide | 7.5                                              | 6.9            | 7.1            | 6.5            | 5.5            | 8.7            | 7.1            | 6.7            | 7.0            | 6.0             | 6.9     | 0.9   | 50.0% CO <sub>2</sub>  |
| Cabbage stem        | Methane        | 0.0                                              | 0.0            | 0.0            | 0.0            | 0.0            | 0.0            | 0.0            | 0.0            | 0.0            | 0.0             | 0.0     | 0.0   | 0.0% CH <sub>4</sub>   |
|                     | Hydrogen       | 7.0                                              | 6.5            | 8.0            | 6.2            | 6.0            | 6.9            | 6.8            | 7.1            | 6.7            | 7.0             | 6.8     | 0.5   | 60.8% H <sub>2</sub>   |
|                     | Carbon dioxide | 5.9                                              | 5.8            | 4.8            | 4.6            | 4.0            | 5.1            | 3.8            | 3.0            | 3.1            | 4.0             | 4.4     | 1.0   | 39.2% CO <sub>2</sub>  |
| Lotus root peel     | Methane        | 0.0                                              | 0.0            | 0.0            | 0.0            | 0.0            | 0.0            | 0.0            | 0.0            | 0.0            | 0.0             | 0.0     | 0.0   | 0.0% CH <sub>4</sub>   |
|                     | Hydrogen       | 4.3                                              | 4.0            | 2.7            | 2.9            | 3.1            | 3.6            | 3.1            | 2.9            | 2.8            | 3.2             | 3.2     | 0.5   | 43.5% H <sub>2</sub>   |
|                     | Carbon dioxide | 5.3                                              | 5.1            | 4.8            | 3.9            | 2.9            | 4.3            | 3.9            | 3.7            | 4.2            | 4.2             | 4.2     | 0.7   | 56.5% CO <sub>2</sub>  |
| Apple core and peel | Methane        | 0.0                                              | 0.0            | 0.0            | 0.0            | 0.0            | 0.0            | 0.0            | 0.0            | 0.0            | 0.0             | 0.0     | 0.0   | 0.0% CH <sub>4</sub>   |
|                     | Hydrogen       | 10.0                                             | 10.7           | 10.4           | 3.6            | 8.5            | 6.1            | 5.9            | 6.3            | 8.0            | 7.8             | 7.7     | 2.3   | 65.0% H <sub>2</sub>   |
|                     | Carbon dioxide | 5.1                                              | 5.3            | 4.7            | 4.3            | 2.5            | 3.8            | 3.3            | 3.8            | 4.4            | 4.3             | 4.2     | 0.8   | 35.0% CO <sub>2</sub>  |
| Orange peel         | Methane        | 0.0                                              | 0.0            | 0.0            |                |                |                |                |                |                |                 |         |       |                        |
|                     | Hydrogen       | 0.0                                              | 0.0            | 0.0            |                |                |                |                |                |                |                 |         |       |                        |
|                     | Carbon dioxide | 0.0                                              | 0.0            | 0.0            |                |                |                |                |                |                |                 |         |       |                        |
| Grape peel          | Methane        | 0.0                                              | 0.0            | 0.0            | 0.0            | 0.0            | 0.0            | 0.0            | 0.0            | 0.0            | 0.0             | 0.0     | 0.0   | 0.0% CH <sub>4</sub>   |
|                     | Hydrogen       | 6.2                                              | 9.7            | 11.3           | 8.5            | 6.6            | 8.0            | 8.3            | 8.3            | 7.1            | 9.4             | 8.4     | 1.5   | 66.5% H <sub>2</sub>   |
|                     | Carbon dioxide | 4.2                                              | 4.3            | 4.0            | 4.1            | 3.8            | 5.2            | 3.7            | 4.2            | 4.9            | 3.6             | 4.2     | 0.5   | 33.5% CO <sub>2</sub>  |
| Rice bran           | Methane        | 0.0                                              | 0.0            | 0.0            | 0.0            | 0.0            | 0.0            | 0.0            | 0.0            | 0.0            | 0.0             | 0.0     | 0.0   | 0.0% CH <sub>4</sub>   |
|                     | Hydrogen       | 25.8                                             | 16.2           | 14.6           | 15.4           | 15.7           | 15.2           | 14.3           | 16.0           | 13.1           | 12.0            | 15.8    | 3.7   | 74.7% H <sub>2</sub>   |
|                     | Carbon dioxide | 9.1                                              | 9.0            | 8.3            | 4.8            | 4.2            | 3.8            | 3.8            | 4.1            | 3.4            | 2.9             | 5.4     | 2.5   | 25.3% CO <sub>2</sub>  |
| Wheat bran          | Methane        | 0.0                                              | 0.0            | 0.0            | 0.0            | 0.0            | 0.0            | 0.0            | 0.0            | 0.0            | 0.0             | 0.0     | 0.0   | 0.0% CH <sub>4</sub>   |
|                     | Hydrogen       | 12.1                                             | 18.6           | 14.1           | 11.2           | 15.5           | 15.3           | 12.6           | 11.0           | 13.9           | 13.5            | 13.8    | 2.3   | 79.7% H <sub>2</sub>   |
|                     | Carbon dioxide | 2.8                                              | 4.7            | 3.3            | 2.8            | 4.5            | 4.2            | 3.5            | 2.5            | 3.6            | 3.3             | 3.5     | 0.7   | 20.3% CO <sub>2</sub>  |
| Rice hull           | Methane        | 0.0                                              | 0.0            | 0.0            | 0.0            | 0.0            | 0.0            | 0.0            | 0.0            | 0.0            | 0.0             | 0.0     | 0.0   | 0.0% CH <sub>4</sub>   |
|                     | Hydrogen       | 0.7                                              | 1.4            | 2.6            | 2.2            | 0.8            | 1.0            | 0.5            | 0.5            | 0.2            | 0.3             | 1.0     | 0.8   | 73.9% H <sub>2</sub>   |
|                     | Carbon dioxide | 0.5                                              | 0.6            | 0.2            | 0.3            | 0.3            | 0.5            | 0.3            | 0.4            | 0.1            | 0.3             | 0.4     | 0.1   | 26.1% CO <sub>2</sub>  |
| Soy sauce lees      | Methane        | 0.0                                              | 0.0            | 0.0            | 0.0            | 0.0            | 0.0            | 0.0            | 0.0            | 0.0            | 0.0             | 0.0     | 0.0   | 0.0% CH <sub>4</sub>   |
|                     | Hydrogen       | 2.0                                              | 0.8            | 1.3            | 1.8            | 1.9            | 1.7            | 2.0            | 2.0            | 2.0            | 2.1             | 1.8     | 0.4   | 45.5% H <sub>2</sub>   |
|                     | Carbon dioxide | 1.9                                              | 2.0            | 2.1            | 2.0            | 2.0            | 2.6            | 2.1            | 2.0            | 2.0            | 2.3             | 2.1     | 0.2   | 54.5% CO <sub>2</sub>  |
| Spent bonito flakes | Methane        | 13.4                                             | 14.9           | 13.9           | 13.7           | 14.5           | 13.2           | 18.8           | 17.4           | 12.2           | 10.8            | 14.3    | 2.3   | 60.6% CH <sub>4</sub>  |
|                     | Hydrogen       | 0.0                                              | 0.0            | 0.0            | 0.0            | 0.2            | 0.0            | 0.0            | 0.1            | 0.4            | 0.2             | 0.1     | 0.1   | 0.4% H <sub>2</sub>    |
|                     | Carbon dioxide | 8.6                                              | 10.2           | 9.4            | 9.4            | 9.6            | 8.6            | 10.7           | 7.5            | 9.7            | 8.1             | 9.2     | 1.0   | 39.0% CO <sub>2</sub>  |
| Spent dried kelp    | Methane        | 0.0                                              | 0.0            | 0.0            | 0.0            | 0.0            | 0.0            | 0.0            | 0.0            | 0.0            | 0.0             | 0.0     | 0.0   | 0.0% CH <sub>4</sub>   |
|                     | Hydrogen       | 9.4                                              | 10.7           | 10.8           | 11.3           | 11.3           | 11.0           | 11.1           | 10.5           | 12.3           | 11.0            | 10.9    | 0.7   | 76.7% H <sub>2</sub>   |
|                     | Carbon dioxide | 3.5                                              | 3.7            | 3.1            | 3.0            | 3.1            | 3.5            | 3.3            | 3.3            | 3.7            | 3.0             | 3.3     | 0.3   | 23.3% CO <sub>2</sub>  |
| Spent tea leaf      | Methane        | 0.0                                              | 0.0            | 0.0            | 0.0            | 0.0            | 0.0            | 0.0            | 0.0            | 0.0            | 0.0             | 0.0     | 0.0   | 0.0% CH <sub>4</sub>   |
|                     | Hydrogen       | 4.0                                              | 3.2            | 3.3            | 4.2            | 4.9            | 3.7            | 4.0            | 4.1            | 4.3            | 4.7             | 4.0     | 0.5   | 48.8% H <sub>2</sub>   |
|                     | Carbon dioxide | 4.8                                              | 4.4            | 3.6            | 3.7            | 4.0            | 4.0            | 4.2            | 4.6            | 4.1            | 4.9             | 4.2     | 0.4   | 51.2% CO <sub>2</sub>  |
| Spent coffee ground | Methane        | 0.0                                              | 0.0            | 0.0            | 0.0            | 0.0            | 0.0            | 0.0            | 0.0            | 0.0            | 0.0             | 0.0     | 0.0   | 0.0% CH <sub>4</sub>   |
|                     | Hydrogen       | 4.1                                              | 3.5            | 3.3            | 3.6            | 3.1            | 2.9            | 3.7            | 3.9            | 4.1            | 3.7             | 3.6     | 0.4   | 47.5% H <sub>2</sub>   |
|                     | Carbon dioxide | 4.6                                              | 4.1            | 3.9            | 3.2            | 3.6            | 4.7            | 3.9            | 4.0            | 3.1            | 4.6             | 4.0     | 0.6   | 52.5% CO <sub>2</sub>  |
| Rapeseed oil cake   | Methane        | 0.0                                              | 0.0            | 0.0            | 0.0            | 0.0            | 0.0            | 0.0            | 0.0            | 0.0            | 0.0             | 0.0     | 0.0   | 0.0% CH <sub>4</sub>   |
|                     | Hydrogen       | 9.7                                              | 14.6           | 12.8           | 11.4           | 11.9           | 12.0           | 13.0           | 11.2           | 12.6           | 12.7            | 12.2    | 1.3   | 53.7% H <sub>2</sub>   |
|                     | Carbon dioxide | 10.8                                             | 11.9           | 10.8           | 11.2           | 9.8            | 12.7           | 12.0           | 10.4           | 8.8            | 6.9             | 10.5    | 1.7   | 46.3% CO <sub>2</sub>  |

Table S3. Biogas production from FPWs by the subcultured DABYS-G microflorae

| Substrate           | Gas            | Biogas yield in each subculture (mL/g-substrate) |                |                |                |                |                |                |                |                |                 | Average | Stdev | Biogas composition (%) |
|---------------------|----------------|--------------------------------------------------|----------------|----------------|----------------|----------------|----------------|----------------|----------------|----------------|-----------------|---------|-------|------------------------|
|                     |                | 1st subculture                                   | 2nd subculture | 3rd subculture | 4th subculture | 5th subculture | 6th subculture | 7th subculture | 8th subculture | 9th subculture | 10th subculture |         |       |                        |
| Cattle bone         | Methane        | 7.3                                              | 7.8            | 7.5            | 8.0            | 7.6            | 7.4            | 7.7            | 7.3            | 6.6            | 5.9             | 7.3     | 0.6   | 46.9% CH <sub>4</sub>  |
|                     | Hydrogen       | 0.1                                              | 0.0            | 0.0            | 0.0            | 0.1            | 0.0            | 0.2            | 0.0            | 0.0            | 0.1             | 0.1     | 0.1   | 0.4% H <sub>2</sub>    |
|                     | Carbon dioxide | 7.6                                              | 8.2            | 8.4            | 8.4            | 7.9            | 8.5            | 8.4            | 8.2            | 7.5            | 9.1             | 8.2     | 0.5   | 52.7% CO <sub>2</sub>  |
| Fish bone           | Methane        | 4.5                                              | 4.5            | 3.2            | 3.3            | 3.9            | 3.9            | 3.5            | 3.3            | 2.8            | 3.2             | 3.6     | 0.6   | 29.1% CH <sub>4</sub>  |
|                     | Hydrogen       | 0.0                                              | 0.0            | 0.0            | 0.0            | 0.0            | 0.2            | 0.2            | 0.3            | 0.1            | 0.4             | 0.1     | 0.1   | 1.0% H <sub>2</sub>    |
|                     | Carbon dioxide | 7.9                                              | 8.8            | 9.2            | 8.2            | 9.6            | 9.1            | 8.5            | 8.3            | 9.1            | 7.9             | 8.7     | 0.6   | 69.9% CO <sub>2</sub>  |
| Carrot peel         | Methane        | 0.0                                              | 0.0            | 0.0            | 0.0            | 0.0            | 0.0            | 0.0            | 0.0            | 0.0            | 0.0             | 0.0     | 0.0   | 0.0% CH <sub>4</sub>   |
|                     | Hydrogen       | 10.2                                             | 9.7            | 10.5           | 9.3            | 9.6            | 8.9            | 6.7            | 11.0           | 8.9            | 15.7            | 10.1    | 2.3   | 68.9% H <sub>2</sub>   |
|                     | Carbon dioxide | 4.6                                              | 4.2            | 4.6            | 4.0            | 4.6            | 4.0            | 2.9            | 4.8            | 4.4            | 7.4             | 4.5     | 1.1   | 31.1% CO <sub>2</sub>  |
| White radish peel   | Methane        | 0.0                                              | 0.0            | 0.0            | 0.0            | 0.0            | 0.0            | 0.0            | 0.0            | 0.0            | 0.0             | 0.0     | 0.0   | 0.0% CH <sub>4</sub>   |
|                     | Hydrogen       | 8.1                                              | 7.6            | 7.6            | 7.0            | 6.1            | 7.6            | 8.4            | 7.7            | 8.0            | 6.2             | 7.4     | 0.8   | 49.3% H <sub>2</sub>   |
|                     | Carbon dioxide | 7.1                                              | 8.6            | 7.6            | 7.4            | 6.6            | 8.6            | 7.4            | 7.6            | 8.6            | 7.2             | 7.6     | 0.7   | 50.7% CO <sub>2</sub>  |
| Cabbage stem        | Methane        | 0.0                                              | 0.0            | 0.0            | 0.0            | 0.0            | 0.0            | 0.0            | 0.0            | 0.0            | 0.0             | 0.0     | 0.0   | 0.0% CH <sub>4</sub>   |
|                     | Hydrogen       | 9.3                                              | 9.9            | 8.9            | 9.2            | 9.7            | 9.0            | 8.6            | 10.9           | 10.4           | 10.0            | 9.6     | 0.7   | 57.8% H <sub>2</sub>   |
|                     | Carbon dioxide | 6.8                                              | 7.1            | 6.1            | 6.7            | 7.0            | 7.5            | 6.7            | 7.5            | 7.4            | 7.0             | 7.0     | 0.4   | 42.2% CO <sub>2</sub>  |
| Lotus root peel     | Methane        | 0.0                                              | 0.0            | 0.0            | 0.0            | 0.0            | 0.0            | 0.0            | 0.0            | 0.0            | 0.0             | 0.0     | 0.0   | 0% CH <sub>4</sub>     |
|                     | Hydrogen       | 0.0                                              | 0.0            | 0.2            | 0.2            | 0.3            | 0.0            | 0.0            | 0.0            | 0.0            | 0.0             | 0.1     | 0.1   | 1.1% H <sub>2</sub>    |
|                     | Carbon dioxide | 6.0                                              | 6.0            | 6.7            | 6.1            | 6.5            | 8.2            | 6.8            | 7.0            | 7.3            | 6.1             | 6.7     | 0.7   | 98.9% CO <sub>2</sub>  |
| Apple core and peel | Methane        | 0.0                                              | 0.0            | 0.0            | 0.0            | 0.0            | 0.0            | 0.0            | 0.0            | 0.0            | 0.0             | 0.0     | 0.0   | 0.0% CH <sub>4</sub>   |
|                     | Hydrogen       | 13.0                                             | 9.2            | 9.7            | 11.7           | 9.1            | 10.6           | 10.3           | 9.3            | 10.2           | 10.6            | 10.4    | 1.2   | 74.3% H <sub>2</sub>   |
|                     | Carbon dioxide | 4.9                                              | 3.5            | 3.9            | 2.7            | 3.6            | 2.7            | 3.3            | 3.8            | 3.6            | 4.0             | 3.6     | 0.6   | 25.7% CO <sub>2</sub>  |
| Orange peel         | Methane        | 0.0                                              | 0.0            | 0.0            |                |                |                |                |                |                |                 |         |       |                        |
|                     | Hydrogen       | 0.0                                              | 0.0            | 0.0            |                |                |                |                |                |                |                 |         |       |                        |
|                     | Carbon dioxide | 0.0                                              | 0.0            | 0.0            |                |                |                |                |                |                |                 |         |       |                        |
| Grape peel          | Methane        | 0.0                                              | 0.0            | 0.0            | 0.0            | 0.0            | 0.0            | 0.0            | 0.0            | 0.0            | 0.0             | 0.0     | 0.0   | 0.0% CH <sub>4</sub>   |
|                     | Hydrogen       | 11.5                                             | 10.8           | 11.4           | 11.7           | 9.8            | 8.9            | 10.1           | 10.5           | 11.6           | 11.0            | 10.7    | 0.9   | 68.8% H <sub>2</sub>   |
|                     | Carbon dioxide | 5.7                                              | 5.4            | 4.8            | 4.5            | 4.9            | 5.0            | 4.0            | 4.1            | 5.5            | 4.8             | 4.9     | 0.6   | 31.2% CO <sub>2</sub>  |
| Rice bran           | Methane        | 0.0                                              | 0.0            | 0.0            | 0.0            | 0.0            | 0.0            | 0.0            | 0.0            | 0.0            | 0.0             | 0.0     | 0.0   | 0.0% CH <sub>4</sub>   |
|                     | Hydrogen       | 8.9                                              | 15.7           | 14.1           | 13.8           | 14.9           | 15.1           | 12.3           | 18.1           | 13.6           | 15.9            | 14.2    | 2.4   | 64.8% H <sub>2</sub>   |
|                     | Carbon dioxide | 6.1                                              | 6.5            | 8.3            | 7.5            | 7.7            | 8.4            | 7.5            | 8.5            | 7.6            | 9.1             | 7.7     | 0.9   | 35.2% CO <sub>2</sub>  |
| Wheat bran          | Methane        | 0.0                                              | 0.0            | 0.0            | 0.0            | 0.0            | 0.0            | 0.0            | 0.0            | 0.0            | 0.0             | 0.0     | 0.0   | 0.0% CH <sub>4</sub>   |
|                     | Hydrogen       | 10.1                                             | 14.0           | 12.6           | 15.0           | 11.5           | 10.8           | 10.8           | 15.9           | 18.2           | 20.4            | 13.9    | 3.5   | 66.5% H <sub>2</sub>   |
|                     | Carbon dioxide | 5.1                                              | 7.3            | 7.9            | 6.9            | 6.5            | 6.1            | 5.9            | 5.5            | 9.5            | 9.6             | 7.0     | 1.6   | 33.5% CO <sub>2</sub>  |
| Rice hull           | Methane        | 0.0                                              | 0.0            | 0.0            | 0.0            | 0.0            | 0.0            | 0.0            | 0.0            | 0.0            | 0.0             | 0.0     | 0.0   | 0.0% CH <sub>4</sub>   |
|                     | Hydrogen       | 0.7                                              | 0.8            | 0.9            | 1.3            | 0.2            | 0.8            | 0.8            | 0.7            | 2.6            | 1.5             | 1.0     | 0.7   | 60.7% H <sub>2</sub>   |
|                     | Carbon dioxide | 1.1                                              | 0.3            | 0.5            | 0.5            | 0.6            | 1.7            | 0.3            | 0.4            | 0.4            | 0.8             | 0.7     | 0.4   | 39.3% CO <sub>2</sub>  |
| Soy sauce lees      | Methane        | 0.0                                              | 0.0            | 0.0            | 0.0            | 0.0            | 0.0            | 0.0            | 0.0            | 0.0            | 0.0             | 0.0     | 0.0   | 0.0% CH <sub>4</sub>   |
|                     | Hydrogen       | 2.0                                              | 2.2            | 2.0            | 3.0            | 1.7            | 2.0            | 2.0            | 1.9            | 1.9            | 2.1             | 2.1     | 0.3   | 48.9% H <sub>2</sub>   |
|                     | Carbon dioxide | 2.8                                              | 2.6            | 2.0            | 2.3            | 1.6            | 2.0            | 2.1            | 2.2            | 2.2            | 1.9             | 2.2     | 0.3   | 51.1% CO <sub>2</sub>  |
| Spent bonito flakes | Methane        | 10.4                                             | 8.1            | 7.5            | 7.6            | 8.4            | 8.3            | 6.5            | 7.8            | 8.4            | 7.3             | 8.0     | 1.0   | 48.5% CH <sub>4</sub>  |
|                     | Hydrogen       | 0.1                                              | 0.1            | 0.0            | 0.0            | 0.0            | 0.0            | 0.0            | 0.2            | 0.2            | 0.1             | 0.1     | 0.1   | 0.4% H <sub>2</sub>    |
|                     | Carbon dioxide | 9.8                                              | 9.3            | 8.8            | 7.9            | 9.1            | 7.6            | 8.3            | 7.3            | 8.6            | 8.1             | 8.5     | 0.8   | 51.2% CO <sub>2</sub>  |
| Spent dried kelp    | Methane        | 0.0                                              | 0.0            | 0.0            | 0.0            | 0.0            | 0.0            | 0.0            | 0.0            | 0.0            | 0.0             | 0.0     | 0.0   | 0.0% CH <sub>4</sub>   |
|                     | Hydrogen       | 9.4                                              | 10.5           | 8.8            | 9.8            | 11.4           | 11.3           | 9.2            | 9.5            | 11.3           | 11.0            | 10.2    | 1.0   | 75.6% H <sub>2</sub>   |
|                     | Carbon dioxide | 3.3                                              | 3.3            | 3.8            | 3.0            | 3.5            | 3.2            | 3.2            | 3.1            | 3.5            | 3.0             | 3.3     | 0.3   | 24.4% CO <sub>2</sub>  |
| Spent tea leaf      | Methane        | 0.0                                              | 0.0            | 0.0            | 0.0            | 0.0            | 0.0            | 0.0            | 0.0            | 0.0            | 0.0             | 0.0     | 0.0   | 0.0% CH <sub>4</sub>   |
|                     | Hydrogen       | 3.6                                              | 3.4            | 4.8            | 4.5            | 4.0            | 4.1            | 3.7            | 4.6            | 4.5            | 3.8             | 4.1     | 0.5   | 49.5% H <sub>2</sub>   |
|                     | Carbon dioxide | 4.1                                              | 3.8            | 4.8            | 3.1            | 4.9            | 4.5            | 4.6            | 4.8            | 3.7            | 3.8             | 4.2     | 0.6   | 50.5% CO <sub>2</sub>  |
| Spent coffee ground | Methane        | 0.0                                              | 0.0            | 0.0            | 0.0            | 0.0            | 0.0            | 0.0            | 0.0            | 0.0            | 0.0             | 0.0     | 0.0   | 0.0% CH <sub>4</sub>   |
|                     | Hydrogen       | 3.9                                              | 3.8            | 4.1            | 4.0            | 3.8            | 3.5            | 4.4            | 4.1            | 3.8            | 4.0             | 3.9     | 0.2   | 55.8% H <sub>2</sub>   |
|                     | Carbon dioxide | 3.5                                              | 2.8            | 3.8            | 3.1            | 3.0            | 3.1            | 3.1            | 2.6            | 2.6            | 3.6             | 3.1     | 0.4   | 44.2% CO <sub>2</sub>  |
| Rapeseed oil cake   | Methane        | 0.0                                              | 0.0            | 0.0            | 0.0            | 0.0            | 0.0            | 0.0            | 0.0            | 0.0            | 0.0             | 0.0     | 0.0   | 0.0% CH <sub>4</sub>   |
|                     | Hydrogen       | 9.6                                              | 11.3           | 9.6            | 10.3           | 10.0           | 10.4           | 11.3           | 9.9            | 10.4           | 11.4            | 10.4    | 0.7   | 58.3% H <sub>2</sub>   |
|                     | Carbon dioxide | 8.6                                              | 8.2            | 7.5            | 8.8            | 7.8            | 6.9            | 6.8            | 6.8            | 6.5            | 6.7             | 7.5     | 0.8   | 41.7% CO <sub>2</sub>  |

| Substrate           | Gas            | Biogas yield in each subculture (mL/g-substrate) |                |                |                |                |                |                |                |                |                 | Average | Stdev | Biogas composition (%) |
|---------------------|----------------|--------------------------------------------------|----------------|----------------|----------------|----------------|----------------|----------------|----------------|----------------|-----------------|---------|-------|------------------------|
|                     |                | 1st subculture                                   | 2nd subculture | 3rd subculture | 4th subculture | 5th subculture | 6th subculture | 7th subculture | 8th subculture | 9th subculture | 10th subculture |         |       |                        |
| Cattle bone         | Methane        | 6.8                                              | 4.1            | 4.0            | 5.2            | 6.8            | 7.2            | 6.1            | 6.7            | 5.9            | 6.1             | 5.9     | 1.1   | 41.7% CH <sub>4</sub>  |
|                     | Hydrogen       | 0.0                                              | 0.2            | 0.1            | 0.0            | 0.2            | 0.0            | 0.0            | 0.0            | 0.1            | 0.2             | 0.1     | 0.1   | 0.5% H <sub>2</sub>    |
|                     | Carbon dioxide | 7.1                                              | 7.8            | 7.9            | 7.4            | 9.5            | 8.9            | 8.2            | 8.5            | 8.4            | 7.8             | 8.2     | 0.7   | 57.8% CO <sub>2</sub>  |
| Fish bone           | Methane        | 5.0                                              | 3.8            | 3.8            | 3.5            | 3.9            | 3.8            | 4.1            | 2.7            | 3.7            | 3.0             | 3.7     | 0.6   | 31.5% CH <sub>4</sub>  |
|                     | Hydrogen       | 0.0                                              | 0.0            | 0.0            | 0.0            | 0.0            | 0.1            | 0.0            | 0.0            | 0.1            | 0.2             | 0.0     | 0.1   | 0.4% H <sub>2</sub>    |
|                     | Carbon dioxide | 8.0                                              | 7.3            | 8.0            | 7.6            | 8.1            | 8.6            | 7.5            | 8.3            | 8.4            | 8.9             | 8.1     | 0.5   | 68.1% CO <sub>2</sub>  |
| Carrot peel         | Methane        | 0.0                                              | 0.0            | 0.0            | 0.0            | 0.0            | 0.0            | 0.0            | 0.0            | 0.0            | 0.0             | 0.0     | 0.0   | 0.0% CH <sub>4</sub>   |
|                     | Hydrogen       | 8.2                                              | 6.1            | 8.7            | 5.4            | 5.2            | 4.9            | 4.3            | 4.8            | 5.0            | 8.1             | 6.1     | 1.6   | 64.4% H <sub>2</sub>   |
|                     | Carbon dioxide | 5.0                                              | 3.3            | 4.0            | 2.7            | 3.2            | 3.0            | 2.4            | 2.7            | 3.0            | 4.3             | 3.3     | 0.8   | 35.6% CO <sub>2</sub>  |
| White radish peel   | Methane        | 0.0                                              | 0.0            | 0.0            | 0.0            | 0.0            | 0.0            | 0.0            | 0.0            | 0.0            | 0.0             | 0.0     | 0.0   | 0.0% CH <sub>4</sub>   |
|                     | Hydrogen       | 6.1                                              | 6.7            | 6.6            | 7.0            | 6.9            | 7.3            | 7.1            | 7.9            | 7.6            | 7.0             | 7.0     | 0.5   | 59.8% H <sub>2</sub>   |
|                     | Carbon dioxide | 8.1                                              | 3.5            | 3.8            | 6.1            | 4.6            | 4.9            | 4.8            | 3.2            | 4.4            | 3.7             | 4.7     | 1.5   | 40.2% CO <sub>2</sub>  |
| Cabbage stem        | Methane        | 0.0                                              | 0.0            | 0.0            | 0.0            | 0.0            | 0.0            | 0.0            | 0.0            | 0.0            | 0.0             | 0.0     | 0.0   | 0.0% CH <sub>4</sub>   |
|                     | Hydrogen       | 10.0                                             | 9.2            | 9.3            | 9.6            | 10.0           | 9.7            | 9.4            | 9.4            | 9.8            | 9.4             | 9.6     | 0.3   | 58.8% H <sub>2</sub>   |
|                     | Carbon dioxide | 7.8                                              | 7.1            | 6.3            | 6.7            | 7.0            | 6.5            | 6.7            | 6.6            | 6.0            | 6.5             | 6.7     | 0.5   | 41.2% CO <sub>2</sub>  |
| Lotus root peel     | Methane        | 0.0                                              | 0.0            | 0.0            | 0.0            | 0.0            | 0.0            | 0.0            | 0.0            | 0.0            | 0.0             | 0.0     | 0.0   | 0.0% CH <sub>4</sub>   |
|                     | Hydrogen       | 0.4                                              | 0.7            | 0.6            | 0.3            | 0.3            | 1.0            | 0.9            | 0.5            | 0.7            | 0.8             | 0.6     | 0.2   | 10.7% H <sub>2</sub>   |
|                     | Carbon dioxide | 6.8                                              | 6.0            | 6.4            | 5.2            | 0.0            | 5.1            | 5.0            | 5.0            | 5.6            | 5.9             | 5.1     | 1.9   | 89.3% CO <sub>2</sub>  |
| Apple core and peel | Methane        | 0.0                                              | 0.0            | 0.0            | 0.0            | 0.0            | 0.0            | 0.0            | 0.0            | 0.0            | 0.0             | 0.0     | 0.0   | 0.0% CH <sub>4</sub>   |
|                     | Hydrogen       | 11.9                                             | 10.2           | 7.2            | 9.6            | 9.0            | 8.3            | 8.3            | 9.1            | 9.1            | 9.6             | 9.2     | 1.3   | 73.3% H <sub>2</sub>   |
|                     | Carbon dioxide | 4.6                                              | 3.3            | 2.5            | 3.1            | 3.5            | 3.2            | 3.2            | 3.0            | 3.4            | 3.7             | 3.3     | 0.5   | 26.7% CO <sub>2</sub>  |
| Orange peel         | Methane        | 0.0                                              | 0.0            | 0.0            |                |                |                |                |                |                |                 |         |       |                        |
|                     | Hydrogen       | 0.0                                              | 0.0            | 0.0            |                |                |                |                |                |                |                 |         |       |                        |
|                     | Carbon dioxide | 0.0                                              | 0.0            | 0.0            |                |                |                |                |                |                |                 |         |       |                        |
| Grape peel          | Methane        | 0.0                                              | 0.0            | 0.0            | 0.0            | 0.0            | 0.0            | 0.0            | 0.0            | 0.0            | 0.0             | 0.0     | 0.0   | 0.0% CH <sub>4</sub>   |
|                     | Hydrogen       | 8.3                                              | 9.3            | 9.3            | 10.2           | 10.0           | 9.3            | 9.0            | 8.1            | 11.0           | 11.7            | 9.6     | 1.1   | 74.3% H <sub>2</sub>   |
|                     | Carbon dioxide | 4.2                                              | 3.7            | 2.1            | 3.6            | 3.4            | 3.1            | 3.4            | 3.2            | 3.0            | 3.6             | 3.3     | 0.5   | 25.7% CO <sub>2</sub>  |
| Rice bran           | Methane        | 0.0                                              | 0.0            | 0.0            | 0.0            | 0.0            | 0.0            | 0.0            | 0.0            | 0.0            | 0.0             | 0.0     | 0.0   | 0.0% CH <sub>4</sub>   |
|                     | Hydrogen       | 6.5                                              | 4.1            | 6.8            | 7.4            | 8.3            | 6.7            | 8.2            | 6.2            | 8.5            | 5.3             | 6.8     | 1.4   | 60.9% H <sub>2</sub>   |
|                     | Carbon dioxide | 6.5                                              | 3.5            | 2.7            | 4.1            | 5.1            | 5.3            | 4.3            | 3.4            | 4.5            | 4.3             | 4.4     | 1.1   | 39.1% CO <sub>2</sub>  |
| Wheat bran          | Methane        | 0.0                                              | 0.0            | 0.0            | 0.0            | 0.0            | 0.0            | 0.0            | 0.0            | 0.0            | 0.0             | 0.0     | 0.0   | 0.0% CH <sub>4</sub>   |
|                     | Hydrogen       | 2.3                                              | 2.7            | 4.2            | 6.8            | 7.8            | 7.3            | 9.2            | 11.6           | 10.6           | 11.2            | 7.4     | 3.4   | 64.0% H <sub>2</sub>   |
|                     | Carbon dioxide | 6.5                                              | 6.1            | 5.1            | 4.6            | 3.1            | 2.2            | 2.4            | 2.0            | 5.0            | 4.5             | 4.1     | 1.6   | 36.0% CO <sub>2</sub>  |
| Rice hull           | Methane        | 0.0                                              | 0.0            | 0.0            | 0.0            | 0.0            | 0.0            | 0.0            | 0.0            | 0.0            | 0.0             | 0.0     | 0.0   | 0.0% CH <sub>4</sub>   |
|                     | Hydrogen       | 0.6                                              | 0.7            | 0.9            | 0.1            | 0.2            | 0.0            | 1.1            | 1.1            | 1.0            | 1.2             | 0.7     | 0.4   | 61.3% H <sub>2</sub>   |
|                     | Carbon dioxide | 0.6                                              | 0.3            | 0.3            | 0.4            | 0.5            | 0.5            | 0.4            | 0.3            | 0.5            | 0.4             | 0.4     | 0.1   | 38.7% CO <sub>2</sub>  |
| Soy sauce lees      | Methane        | 0.0                                              | 0.0            | 0.0            | 0.0            | 0.0            | 0.0            | 0.0            | 0.0            | 0.0            | 0.0             | 0.0     | 0.0   | 0.0% CH <sub>4</sub>   |
|                     | Hydrogen       | 2.1                                              | 3.0            | 2.5            | 1.9            | 2.0            | 2.0            | 2.8            | 2.1            | 2.6            | 2.0             | 2.3     | 0.4   | 50.1% H <sub>2</sub>   |
|                     | Carbon dioxide | 2.3                                              | 2.6            | 3.0            | 2.5            | 1.9            | 1.7            | 2.0            | 2.0            | 2.0            | 2.8             | 2.3     | 0.4   | 49.9% CO <sub>2</sub>  |
| Spent bonito flakes | Methane        | 5.3                                              | 10.7           | 8.0            | 7.4            | 8.6            | 8.6            | 7.4            | 7.4            | 6.8            | 4.9             | 7.5     | 1.7   | 47.6% CH <sub>4</sub>  |
|                     | Hydrogen       | 0.0                                              | 0.0            | 0.0            | 0.0            | 0.0            | 0.0            | 0.0            | 0.0            | 0.1            | 0.0             | 0.0     | 0.0   | 0.1% H <sub>2</sub>    |
|                     | Carbon dioxide | 7.6                                              | 8.7            | 8.0            | 8.1            | 8.4            | 9.1            | 8.0            | 8.3            | 7.8            | 8.6             | 8.3     | 0.4   | 52.3% CO <sub>2</sub>  |
| Spent dried kelp    | Methane        | 0.0                                              | 0.0            | 0.0            | 0.0            | 0.0            | 0.0            | 0.0            | 0.0            | 0.0            | 0.0             | 0.0     | 0.0   | 0.0% CH <sub>4</sub>   |
|                     | Hydrogen       | 8.7                                              | 8.2            | 9.2            | 8.9            | 8.8            | 9.1            | 8.6            | 9.5            | 8.6            | 6.7             | 8.6     | 0.8   | 71.3% H <sub>2</sub>   |
|                     | Carbon dioxide | 3.9                                              | 3.4            | 3.5            | 3.1            | 3.6            | 3.5            | 3.3            | 3.5            | 3.5            | 3.5             | 3.5     | 0.2   | 28.7% CO <sub>2</sub>  |
| Spent tea leaf      | Methane        | 0.0                                              | 0.0            | 0.0            | 0.0            | 0.0            | 0.0            | 0.0            | 0.0            | 0.0            | 0.0             | 0.0     | 0.0   | 0.0% CH <sub>4</sub>   |
|                     | Hydrogen       | 5.1                                              | 4.8            | 4.7            | 5.7            | 5.0            | 4.7            | 4.1            | 4.9            | 5.0            | 5.5             | 4.9     | 0.4   | 54.7% H <sub>2</sub>   |
|                     | Carbon dioxide | 3.9                                              | 3.8            | 4.0            | 4.1            | 4.7            | 3.7            | 4.7            | 4.1            | 4.1            | 3.8             | 4.1     | 0.4   | 45.3% CO <sub>2</sub>  |
| Spent coffee ground | Methane        | 0.0                                              | 0.0            | 0.0            | 0.0            | 0.0            | 0.0            | 0.0            | 0.0            | 0.0            | 0.0             | 0.0     | 0.0   | 0.0% CH <sub>4</sub>   |
|                     | Hydrogen       | 4.7                                              | 4.4            | 4.6            | 4.4            | 4.2            | 4.0            | 3.9            | 4.2            | 4.0            | 3.8             | 4.2     | 0.3   | 61.6% H <sub>2</sub>   |
|                     | Carbon dioxide | 2.2                                              | 2.1            | 2.9            | 3.1            | 2.5            | 2.8            | 2.8            | 3.1            | 2.7            | 2.3             | 2.6     | 0.4   | 38.4% CO <sub>2</sub>  |
| Rapeseed oil cake   | Methane        | 0.0                                              | 0.0            | 0.0            | 0.0            | 0.0            | 0.0            | 0.0            | 0.0            | 0.0            | 0.0             | 0.0     | 0.0   | 0.0% CH <sub>4</sub>   |
|                     | Hydrogen       | 5.8                                              | 5.2            | 3.4            | 2.6            | 2.8            | 3.0            | 3.2            | 2.8            | 5.1            | 4.3             | 3.8     | 1.2   | 32.4% H <sub>2</sub>   |
|                     | Carbon dioxide | 8.2                                              | 6.1            | 5.4            | 5.3            | 6.2            | 9.6            | 9.2            | 11.2           | 9.4            | 9.1             | 8.0     | 2.1   | 67.6% CO <sub>2</sub>  |

| Substrate           | Gas            | Biogas yield in each subculture (mL/g-substrate) |                |                |                |                |                |                |                |                |                 | Average | Stdev | Biogas composition (%) |
|---------------------|----------------|--------------------------------------------------|----------------|----------------|----------------|----------------|----------------|----------------|----------------|----------------|-----------------|---------|-------|------------------------|
|                     |                | 1st subculture                                   | 2nd subculture | 3rd subculture | 4th subculture | 5th subculture | 6th subculture | 7th subculture | 8th subculture | 9th subculture | 10th subculture |         |       |                        |
| Cattle bone         | Methane        | 6.0                                              | 4.8            | 5.6            | 3.9            | 2.7            | 3.6            | 4.5            | 5.6            | 5.0            | 4.9             | 4.6     | 1.0   | 35.0% CH <sub>4</sub>  |
|                     | Hydrogen       | 0.0                                              | 0.0            | 0.0            | 0.0            | 0.1            | 0.0            | 0.0            | 0.0            | 0.0            | 0.0             | 0.0     | 0.0   | 0.1% H <sub>2</sub>    |
|                     | Carbon dioxide | 7.9                                              | 8.7            | 9.3            | 8.5            | 8.0            | 8.6            | 9.2            | 8.8            | 8.4            | 8.8             | 8.6     | 0.4   | 64.9% CO <sub>2</sub>  |
| Fish bone           | Methane        | 2.6                                              | 2.4            | 2.5            | 2.6            | 2.0            | 1.8            | 1.8            | 2.2            | 3.1            | 2.4             | 2.3     | 0.4   | 38.1% CH <sub>4</sub>  |
|                     | Hydrogen       | 0.0                                              | 0.0            | 0.0            | 0.2            | 0.2            | 0.1            | 0.0            | 0.1            | 0.0            | 0.1             | 0.1     | 0.1   | 1.1% H <sub>2</sub>    |
|                     | Carbon dioxide | 3.0                                              | 3.1            | 3.7            | 3.1            | 4.4            | 4.7            | 4.6            | 4.4            | 2.8            | 3.4             | 3.7     | 0.7   | 60.8% CO <sub>2</sub>  |
| Carrot peel         | Methane        | 0.0                                              | 0.0            | 0.0            | 0.0            | 0.0            | 0.0            | 0.0            | 0.0            | 0.0            | 0.0             | 0.0     | 0.0   | 0.0% CH <sub>4</sub>   |
|                     | Hydrogen       | 10.2                                             | 8.9            | 9.3            | 9.9            | 10.5           | 9.5            | 6.8            | 7.9            | 8.3            | 8.2             | 9.0     | 1.2   | 65.9% H <sub>2</sub>   |
|                     | Carbon dioxide | 3.6                                              | 4.1            | 3.9            | 4.2            | 3.8            | 3.8            | 4.3            | 6.4            | 6.2            | 6.0             | 4.6     | 1.1   | 34.1% CO <sub>2</sub>  |
| White radish peel   | Methane        | 0.0                                              | 0.0            | 0.0            | 0.0            | 0.0            | 0.0            | 0.0            | 0.0            | 0.0            | 0.0             | 0.0     | 0.0   | 0.0% CH <sub>4</sub>   |
|                     | Hydrogen       | 8.1                                              | 6.3            | 6.7            | 7.2            | 6.1            | 7.1            | 6.7            | 6.2            | 7.7            | 7.8             | 7.0     | 0.7   | 54.3% H <sub>2</sub>   |
|                     | Carbon dioxide | 5.1                                              | 4.6            | 6.3            | 5.4            | 6.1            | 5.5            | 6.5            | 6.4            | 6.9            | 5.9             | 5.9     | 0.7   | 45.7% CO <sub>2</sub>  |
| Cabbage stem        | Methane        | 0.0                                              | 0.0            | 0.0            | 0.0            | 0.0            | 0.0            | 0.0            | 0.0            | 0.0            | 0.0             | 0.0     | 0.0   | 0.0% CH <sub>4</sub>   |
|                     | Hydrogen       | 11.7                                             | 10.7           | 11.6           | 12.7           | 9.1            | 9.7            | 10.0           | 10.6           | 10.3           | 10.7            | 10.7    | 1.0   | 64.0% H <sub>2</sub>   |
|                     | Carbon dioxide | 5.8                                              | 5.9            | 6.9            | 7.0            | 5.8            | 6.0            | 5.2            | 5.0            | 6.0            | 6.8             | 6.0     | 0.7   | 36.0% CO <sub>2</sub>  |
| Lotus root peel     | Methane        | 0.0                                              | 0.0            | 0.0            | 0.0            | 0.0            | 0.0            | 0.0            | 0.0            | 0.0            | 0.0             | 0.0     | 0.0   | 0.0% CH <sub>4</sub>   |
|                     | Hydrogen       | 0.4                                              | 0.1            | 0.0            | 0.2            | 0.2            | 0.0            | 0.0            | 0.0            | 0.0            | 0.0             | 0.1     | 0.1   | 1.9% H <sub>2</sub>    |
|                     | Carbon dioxide | 5.8                                              | 5.6            | 5.5            | 5.4            | 3.1            | 2.8            | 3.2            | 3.3            | 6.4            | 5.5             | 4.7     | 1.4   | 98.1% CO <sub>2</sub>  |
| Apple core and peel | Methane        | 0.0                                              | 0.0            | 0.0            | 0.0            | 0.0            | 0.0            | 0.0            | 0.0            | 0.0            | 0.0             | 0.0     | 0.0   | 0.0% CH <sub>4</sub>   |
|                     | Hydrogen       | 8.3                                              | 8.1            | 9.9            | 9.2            | 8.0            | 5.9            | 8.8            | 9.3            | 6.6            | 8.0             | 8.2     | 1.2   | 70.9% H <sub>2</sub>   |
|                     | Carbon dioxide | 4.8                                              | 2.6            | 4.0            | 3.5            | 2.5            | 3.3            | 3.2            | 3.6            | 2.9            | 3.3             | 3.4     | 0.7   | 29.1% CO <sub>2</sub>  |
| Orange peel         | Methane        | 0.0                                              | 0.0            | 0.0            |                |                |                |                |                |                |                 |         |       |                        |
|                     | Hydrogen       | 0.0                                              | 0.0            | 0.0            |                |                |                |                |                |                |                 |         |       |                        |
|                     | Carbon dioxide | 0.0                                              | 0.0            | 0.0            |                |                |                |                |                |                |                 |         |       |                        |
| Grape peel          | Methane        | 0.0                                              | 0.0            | 0.0            | 0.0            | 0.0            | 0.0            | 0.0            | 0.0            | 0.0            | 0.0             | 0.0     | 0.0   | 0.0% CH <sub>4</sub>   |
|                     | Hydrogen       | 7.9                                              | 7.1            | 10.5           | 11.6           | 9.0            | 9.9            | 8.9            | 10.8           | 11.2           | 11.6            | 9.8     | 1.6   | 74.5% H <sub>2</sub>   |
|                     | Carbon dioxide | 4.1                                              | 2.8            | 3.8            | 3.7            | 2.9            | 3.0            | 3.7            | 3.1            | 2.8            | 3.9             | 3.4     | 0.5   | 25.5% CO <sub>2</sub>  |
| Rice bran           | Methane        | 0.0                                              | 0.0            | 0.0            | 0.0            | 0.0            | 0.0            | 0.0            | 0.0            | 0.0            | 0.0             | 0.0     | 0.0   | 0.0% CH <sub>4</sub>   |
|                     | Hydrogen       | 4.3                                              | 4.0            | 5.2            | 4.3            | 7.5            | 5.5            | 3.6            | 3.6            | 3.0            | 4.1             | 4.5     | 1.3   | 40.7% H <sub>2</sub>   |
|                     | Carbon dioxide | 2.0                                              | 2.0            | 2.2            | 10.0           | 8.8            | 9.9            | 8.5            | 8.7            | 3.5            | 10.1            | 6.6     | 3.6   | 59.3% CO <sub>2</sub>  |
| Wheat bran          | Methane        | 0.0                                              | 0.0            | 0.0            | 0.0            | 0.0            | 0.0            | 0.0            | 0.0            | 0.0            | 0.0             | 0.0     | 0.0   | 0.0% CH <sub>4</sub>   |
|                     | Hydrogen       | 11.0                                             | 12.2           | 17.6           | 17.8           | 17.5           | 19.9           | 21.7           | 18.9           | 17.1           | 21.2            | 17.5    | 3.5   | 67.0% H <sub>2</sub>   |
|                     | Carbon dioxide | 7.0                                              | 7.1            | 8.6            | 9.1            | 3.5            | 2.9            | 10.3           | 15.2           | 11.6           | 10.8            | 8.6     | 3.7   | 33.0% CO <sub>2</sub>  |
| Rice hull           | Methane        | 0.0                                              | 0.0            | 0.0            | 0.0            | 0.0            | 0.0            | 0.0            | 0.0            | 0.0            | 0.0             | 0.0     | 0.0   | 0.0% CH <sub>4</sub>   |
|                     | Hydrogen       | 1.1                                              | 1.5            | 1.9            | 1.8            | 1.9            | 1.4            | 1.6            | 1.5            | 0.9            | 1.4             | 1.5     | 0.3   | 61.7% H <sub>2</sub>   |
|                     | Carbon dioxide | 1.0                                              | 0.9            | 1.0            | 1.1            | 0.6            | 0.9            | 1.5            | 1.0            | 0.7            | 0.8             | 0.9     | 0.3   | 38.3% CO <sub>2</sub>  |
| Soy sauce lees      | Methane        | 0.0                                              | 0.0            | 0.0            | 0.0            | 0.0            | 0.0            | 0.0            | 0.0            | 0.0            | 0.0             | 0.0     | 0.0   | 0.0% CH <sub>4</sub>   |
|                     | Hydrogen       | 2.6                                              | 2.3            | 3.1            | 3.1            | 1.0            | 0.9            | 1.4            | 1.8            | 1.9            | 1.4             | 2.0     | 0.8   | 49.8% H <sub>2</sub>   |
|                     | Carbon dioxide | 1.9                                              | 2.9            | 1.9            | 2.1            | 2.0            | 1.0            | 2.7            | 1.8            | 2.0            | 1.5             | 2.0     | 0.5   | 50.2% CO <sub>2</sub>  |
| Spent bonito flakes | Methane        | 5.7                                              | 10.0           | 9.4            | 9.9            | 7.4            | 8.5            | 7.9            | 7.8            | 7.5            | 7.8             | 8.2     | 1.3   | 48.2% CH <sub>4</sub>  |
|                     | Hydrogen       | 0.1                                              | 0.0            | 0.4            | 0.3            | 0.6            | 0.0            | 0.1            | 0.1            | 0.3            | 0.2             | 0.2     | 0.2   | 1.2% H <sub>2</sub>    |
|                     | Carbon dioxide | 5.9                                              | 9.1            | 8.7            | 8.9            | 7.0            | 8.1            | 9.6            | 9.7            | 10.1           | 8.7             | 8.6     | 1.3   | 50.6% CO <sub>2</sub>  |
| Spent dried kelp    | Methane        | 0.0                                              | 0.0            | 0.0            | 0.0            | 0.0            | 0.0            | 0.0            | 0.0            | 0.0            | 0.0             | 0.0     | 0.0   | 0.0% CH <sub>4</sub>   |
|                     | Hydrogen       | 6.4                                              | 7.4            | 8.6            | 6.6            | 8.6            | 9.9            | 8.0            | 8.8            | 10.0           | 9.6             | 8.4     | 1.3   | 72.7% H <sub>2</sub>   |
|                     | Carbon dioxide | 2.7                                              | 3.1            | 2.9            | 3.5            | 3.4            | 3.2            | 3.2            | 3.0            | 3.1            | 3.5             | 3.1     | 0.3   | 27.3% CO <sub>2</sub>  |
| Spent tea leaf      | Methane        | 0.0                                              | 0.0            | 0.0            | 0.0            | 0.0            | 0.0            | 0.0            | 0.0            | 0.0            | 0.0             | 0.0     | 0.0   | 0.0% CH <sub>4</sub>   |
|                     | Hydrogen       | 4.2                                              | 5.0            | 4.9            | 4.8            | 5.0            | 5.2            | 5.8            | 4.7            | 4.9            | 5.0             | 4.9     | 0.4   | 48.7% H <sub>2</sub>   |
|                     | Carbon dioxide | 5.2                                              | 5.7            | 5.7            | 5.0            | 4.9            | 5.0            | 5.5            | 4.9            | 5.0            | 5.0             | 5.2     | 0.3   | 51.3% CO <sub>2</sub>  |
| Spent coffee ground | Methane        | 0.0                                              | 0.0            | 0.0            | 0.0            | 0.0            | 0.0            | 0.0            | 0.0            | 0.0            | 0.0             | 0.0     | 0.0   | 0.0% CH <sub>4</sub>   |
|                     | Hydrogen       | 4.4                                              | 4.1            | 4.7            | 4.0            | 3.4            | 4.2            | 4.1            | 3.8            | 4.2            | 4.0             | 4.1     | 0.4   | 55.7% H <sub>2</sub>   |
|                     | Carbon dioxide | 3.2                                              | 3.7            | 3.1            | 3.2            | 3.7            | 3.7            | 3.2            | 1.8            | 3.7            | 3.1             | 3.2     | 0.6   | 44.3% CO <sub>2</sub>  |
| Rapeseed oil cake   | Methane        | 0.0                                              | 0.0            | 0.0            | 0.0            | 0.0            | 0.0            | 0.0            | 0.0            | 0.0            | 0.0             | 0.0     | 0.0   | 0.0% CH <sub>4</sub>   |
|                     | Hydrogen       | 12.8                                             | 10.2           | 8.0            | 9.5            | 17.5           | 17.2           | 19.9           | 17.5           | 19.7           | 19.1            | 15.1    | 4.6   | 55.9% H <sub>2</sub>   |
|                     | Carbon dioxide | 11.8                                             | 11.2           | 12.9           | 12.2           | 12.2           | 12.4           | 11.3           | 11.9           | 11.5           | 11.8            | 11.9    | 0.5   | 44.1% CO <sub>2</sub>  |

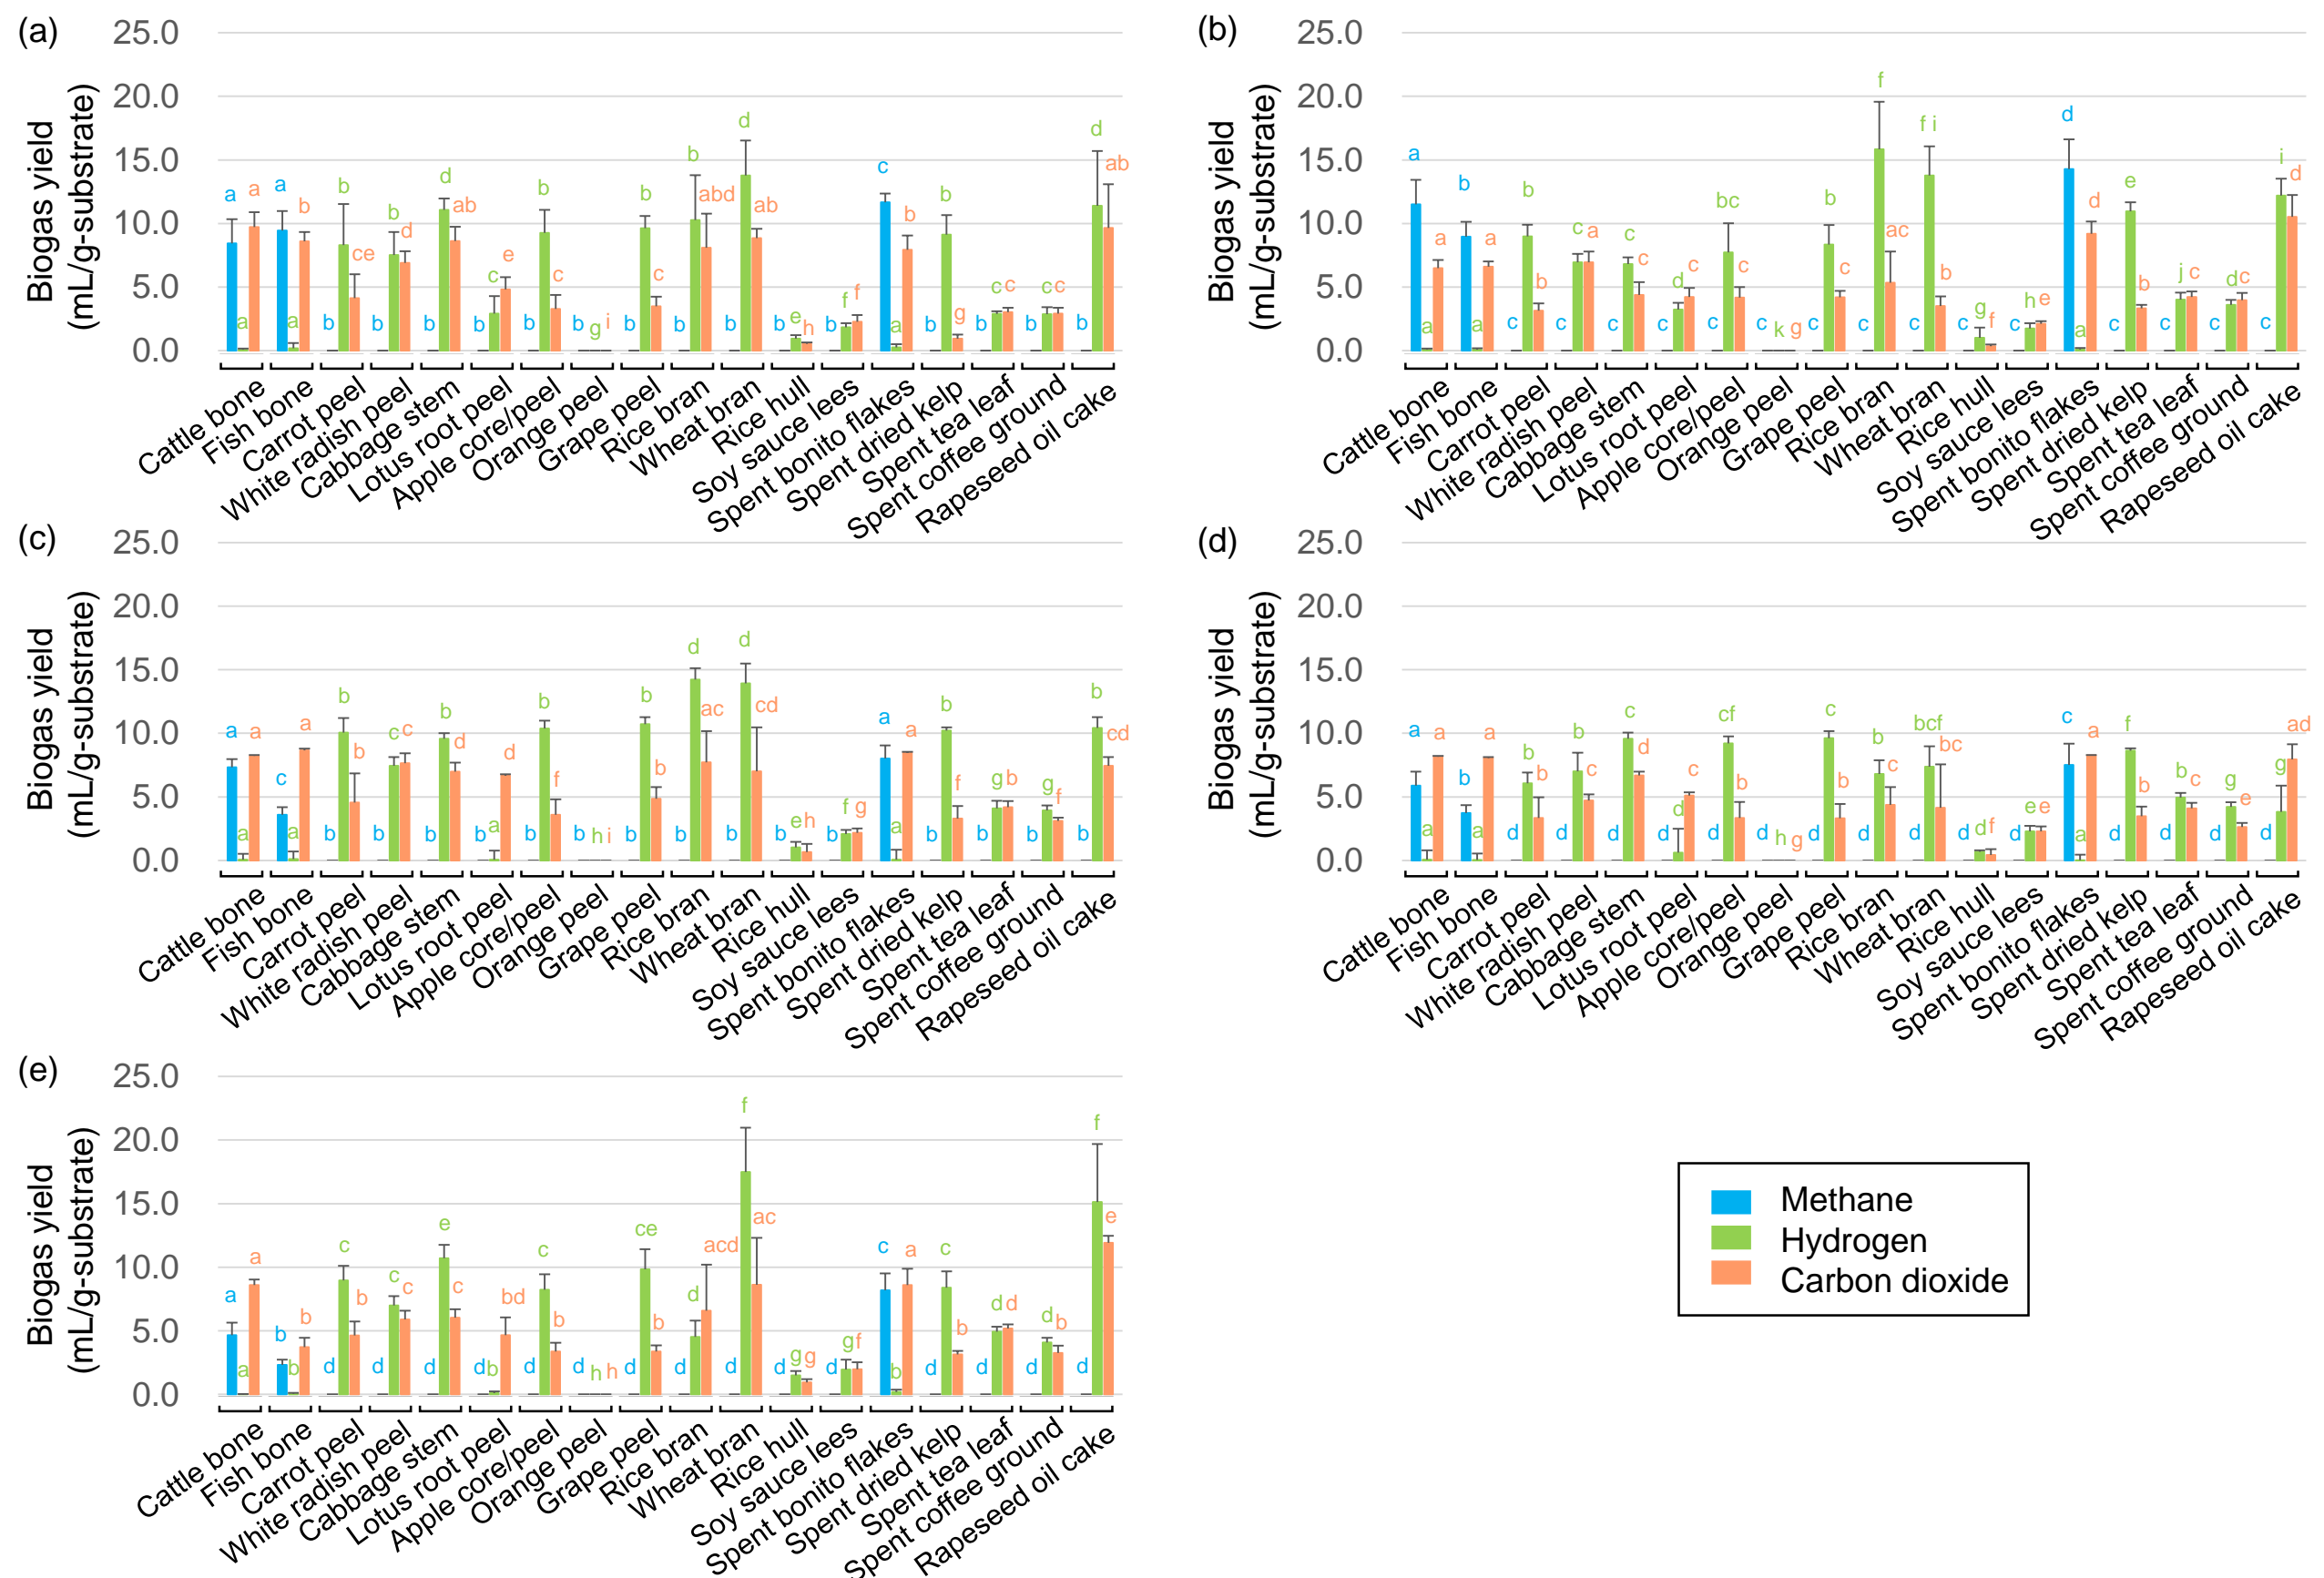

**Figure S1.** Biogas yield of the subcultures originating from DABYS-A (a), DABYS-B (b), DABYE-G (c), DABYE-S (d), and DABYE-R (e) seed microflorae. The data are presented as the mean  $\pm$  standard deviation of independent triplicates. The blue, green, and orange colored letters on the columns indicate significant differences at  $P < 0.05$  (Student's  $t$ -test) in methane, hydrogen, and carbon dioxide yield, respectively.
